# Supplementary material for: Diagnostic Efficacy of Serum Asialo α1-Acid Glycoprotein Levels for Advanced Liver Fibrosis and Cirrhosis in Patients with Chronic Hepatitis B Compared to That in Healthy Subjects: A Prospective Study
Source: MDPI journal article supplement (doi:10.3390/jcm12020712), 2023-01-16
Supplement: s1 [file s1]

**Table S1.** The diagnostic performance of serum AsAGP according to fibrosis stages of CHB patients comparing healthy control.

|                                         | CHB with F0-1 versus.<br>Healthy control | CHB with F2 versus<br>healthy control | CHB with F3 versus<br>healthy control |
|-----------------------------------------|------------------------------------------|---------------------------------------|---------------------------------------|
| AUC (95% CI)                            | 0.610 (0.503 - 0.717)                    | 0.513 (0.342 - 0.684)                 | 0.685 (0.562 – 0.809)                 |
| Optimal cut-off<br>( $\mu\text{g/ml}$ ) | 0.896                                    | 1.001                                 | 0.926                                 |
| Sensitivity                             | 84.6%                                    | 62.5%                                 | 82.6%                                 |
| Specificity                             | 50%                                      | 60.3%                                 | 54.4%                                 |

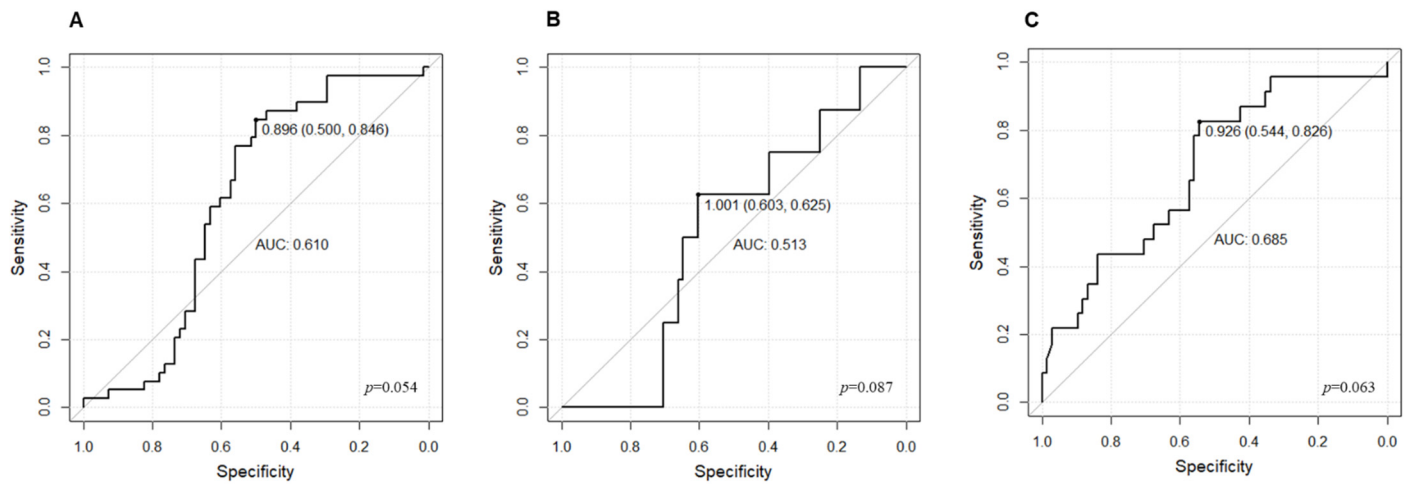

**Figure S1.** The AUROC of serum AsAGP level for differentiating liver fibrosis stages in CHB patients comparing healthy control. A; CHB F0-1 versus healthy control, B; CHB F2 versus healthy control, C; CHB F3 versus healthy control.

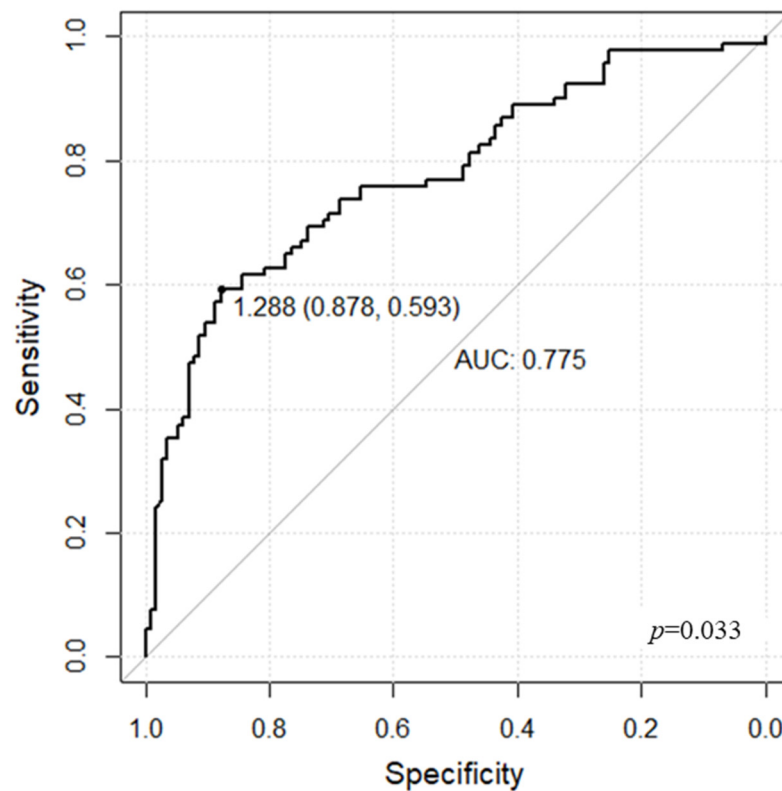

**Figure 2.** The AUROC of serum AsAGP level for differentiating advanced fibrosis in CHB patients comparing healthy control.
